# Supplementary material for: Differences in pregnancy complications and outcomes by fetal gender among Japanese women: a multicenter cross-sectional study
Source: PubMed Central journal article supplement (PMC7606487; doi:10.1038/s41598-020-75969-8), 2020-11-02
Supplement: 41598_2020_75969_MOESM1_ESM.pdf [file 41598_2020_75969_MOESM1_ESM.pdf]

**Differences in pregnancy complications and outcomes by fetal gender among Japanese women:  
a multicenter cross-sectional study**

Satoru Funaki, Kohei Ogawa, Nobuaki Ozawa, Aikou Okamoto, Naho Morisaki & Haruhiko Sago

**Supplemental Table S1. Association between fetal sex and pregnancy complications based on imputed dataset. (n=1,098,268)**

| <b>Outcomes</b>          |        | <b>Crude RR</b>  | <b>Adjusted RR<sup>a</sup></b> |
|--------------------------|--------|------------------|--------------------------------|
| Preeclampsia             | Male   | 0.92 (0.89–0.94) | 0.91 (0.89–0.94)               |
|                          | Female | Reference        | Reference                      |
| HELLP syndrome           | Male   | 1.06 (0.95–1.18) | 1.06 (0.95–1.17)               |
|                          | Female | Reference        | Reference                      |
| Placental abruption      | Male   | 1.14 (1.10–1.19) | 1.14 (1.10–1.19)               |
|                          | Female | Reference        | Reference                      |
| Placenta accreta         | Male   | 0.90 (0.85–0.95) | 0.90 (0.85–0.95)               |
|                          | Female | Reference        | Reference                      |
| Placenta previa          | Male   | 1.01 (0.98–1.04) | 1.01 (0.98–1.04)               |
|                          | Female | Reference        | Reference                      |
| Intrauterine fetal death | Male   | 1.01 (0.96–1.06) | 1.01 (0.96–1.05)               |
|                          | Female | Reference        | Reference                      |
| Chorioamnionitis         | Male   | 1.02 (0.98–1.07) | 1.02 (0.98–1.06)               |
|                          | Female | Reference        | Reference                      |
| Cord prolapse            | Male   | 1.23 (0.98–1.54) | 1.23 (0.96–1.58)               |
|                          | Female | Reference        | Reference                      |
| Amniotic fluid embolism  | Male   | 0.96 (0.69–1.34) | 0.96 (0.69–1.34)               |
|                          | Female | Reference        | Reference                      |

RR: Risk ratio, HELLP: preeclampsia, hemolysis, elevated liver enzymes, and low platelet count. <sup>a</sup>Adjusted for maternal age, maternal height, maternal pre-pregnant body mass index, parity, conception method, and maternal smoking status during pregnancy.

**Supplemental Table S2. Association between fetal sex and delivery outcomes among women with live birth based on imputed dataset. (n=1,091,228)**

| <b>Outcomes</b>                        |        | <b>Crude RR</b>                 | <b>Adjusted RR<sup>a</sup></b>                       |
|----------------------------------------|--------|---------------------------------|------------------------------------------------------|
| <b>Categorized variables</b>           |        |                                 |                                                      |
| Preterm delivery (<37 weeks)           | Male   | 1.19 (1.18–1.21)                | 1.19 (1.18–1.21)                                     |
|                                        | Female | Reference                       | Reference                                            |
| Very preterm delivery (<32 weeks)      | Male   | 1.10 (1.08–1.13)                | 1.10 (1.08–1.13)                                     |
|                                        | Female | Reference                       | Reference                                            |
| Extremely preterm delivery (<28 weeks) | Male   | 1.08 (1.03–1.12)                | 1.08 (1.03–1.12)                                     |
|                                        | Female | Reference                       | Reference                                            |
| Macrosomia                             | Male   | 1.82 (1.74–1.90)                | 1.81 (1.73–1.89)                                     |
|                                        | Female | Reference                       | Reference                                            |
| Low birth weight                       | Male   | 0.87 (0.86–0.87)                | 0.87 (0.86–0.87)                                     |
|                                        | Female | Reference                       | Reference                                            |
| Non-cephalic position at birth         | Male   | 0.87 (0.85–0.88)                | 0.87 (0.85–0.88)                                     |
|                                        | Female | Reference                       | Reference                                            |
| Hypotonic uterine inertia              | Male   | 1.07 (1.06–1.08)                | 1.07 (1.06–1.09)                                     |
|                                        | Female | Reference                       | Reference                                            |
| Hypertonic uterine inertia             | Male   | 1.26 (1.11–1.42)                | 1.26 (1.12–1.42)                                     |
|                                        | Female | Reference                       | Reference                                            |
| Atonic hemorrhage                      | Male   | 0.94 (0.93–0.96)                | 0.94 (0.93–0.96)                                     |
|                                        | Female | Reference                       | Reference                                            |
| Blood transfusion                      | Male   | 0.95 (0.92–0.99)                | 0.96 (0.92–0.99)                                     |
|                                        | Female | Reference                       | Reference                                            |
| Instrumental delivery                  | Male   | 1.27 (1.25–1.29)                | 1.27 (1.26–1.29)                                     |
|                                        | Female | Reference                       | Reference                                            |
| Cesarean delivery                      | Male   | 1.01 (1.00–1.02)                | 1.01 (1.00–1.01)                                     |
|                                        | Female | Reference                       | Reference                                            |
| <b>Continuous variables</b>            |        | <b>Mean difference (95% CI)</b> | <b>Adjusted mean difference<sup>a</sup> (95% CI)</b> |
| Gestational age at birth (weeks)       |        | –0.18 (–0.19 to –0.17)          | –0.18 (–0.19 to –0.17)                               |
| Birth weight (g)                       |        | 78.2 (76.2 to 80.2)             | 78.1 (76.0 to 80.3)                                  |

All mean differences are calculated using females as the reference. RR: risk ratio, CI: confidence interval.

<sup>a</sup>Adjusted for maternal age, maternal height, maternal pre-pregnant body mass index, parity, and maternal smoking status during pregnancy.
